# Supplementary material for: Ti3+ self-doping in BaTiO3 ceramic for multi-sensor applications: reduced bandgap with maintained ferroelectric properties
Source: Royal Society of Chemistry journal article supplement (doi:10.1039/d3tc02590j), 2023-01-01
Supplement: d3tc02590j1.pdf [file d3tc02590j1.pdf]

## Supporting Information for

# **Ti<sup>3+</sup> Self-Doping in BaTiO<sub>3</sub> Ceramic for Multi-Sensor Applications: Reduced Bandgap with Maintained Ferroelectric Properties**

Chen Xi Li<sup>ab</sup>, Xiang Li<sup>ab</sup>, Xin Yi Chen<sup>b</sup>, Chen Chen<sup>c</sup>, Lei Zhao<sup>a\*</sup> and Nan Ma<sup>b\*</sup>

*<sup>a</sup> Key Laboratory of High-precision Computation and Application of Quantum Field Theory of Hebei Province, College Physics Science and Technology, Hebei University, Baoding, 071002, China*

*E-mail: leizhao@hbu.edu.cn*

*<sup>b</sup> CAS Key Laboratory of Inorganic Functional Materials and Devices, Shanghai Institute of Ceramics, Chinese Academy of Sciences, Shanghai, 201899, China. E-mail: manan@mail.sic.ac.cn*

*<sup>c</sup> State Key Laboratory of High Performance Ceramics and Superfine Microstructure, Shanghai Institute of Ceramics, Chinese Academy of Sciences, Shanghai, 201899, China*

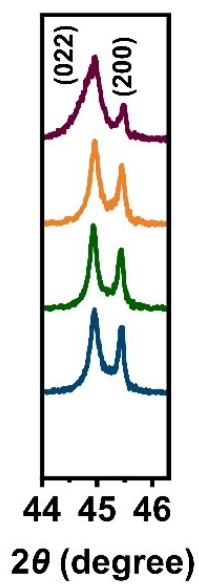

Figure S1 Enlarged XRD patterns around  $45^\circ$ .

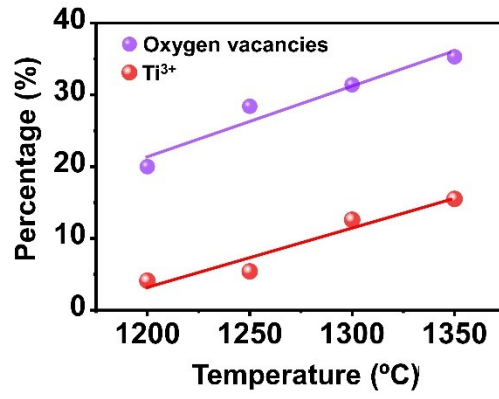

Figure S2 Sintering temperature dependence of the concentration of oxygen vacancies and Ti<sup>3+</sup>.

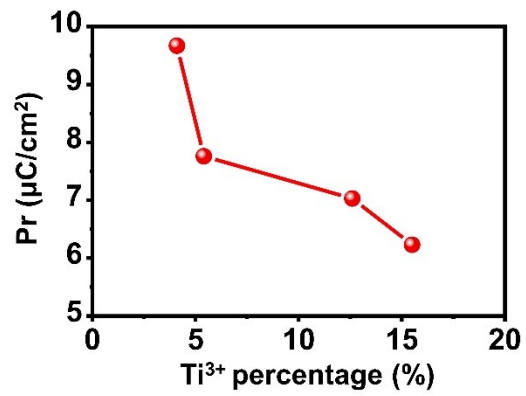

Figure S3 Change of  $P_r$  as a function of the amount of  $Ti^{3+}$ .

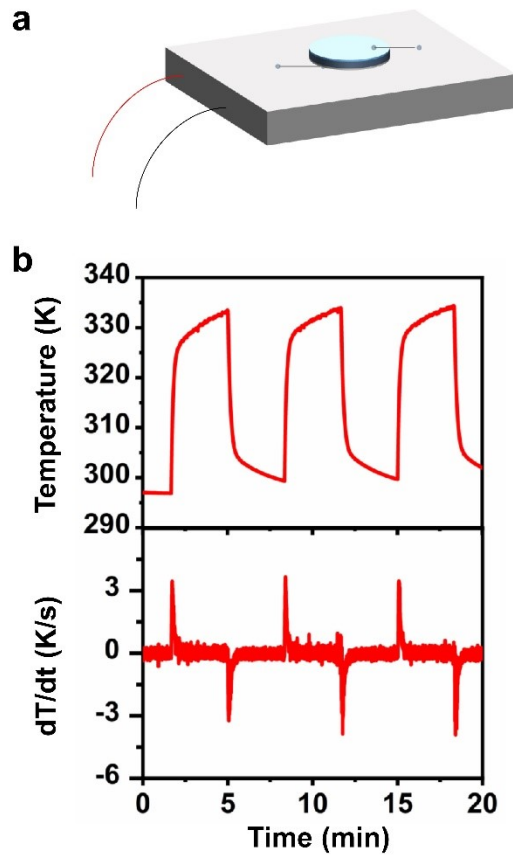

Figure S4 (a) Schematic illustration of the pyroelectric current measurement; (b) The periodic temperature change and the corresponding temperature change rate.

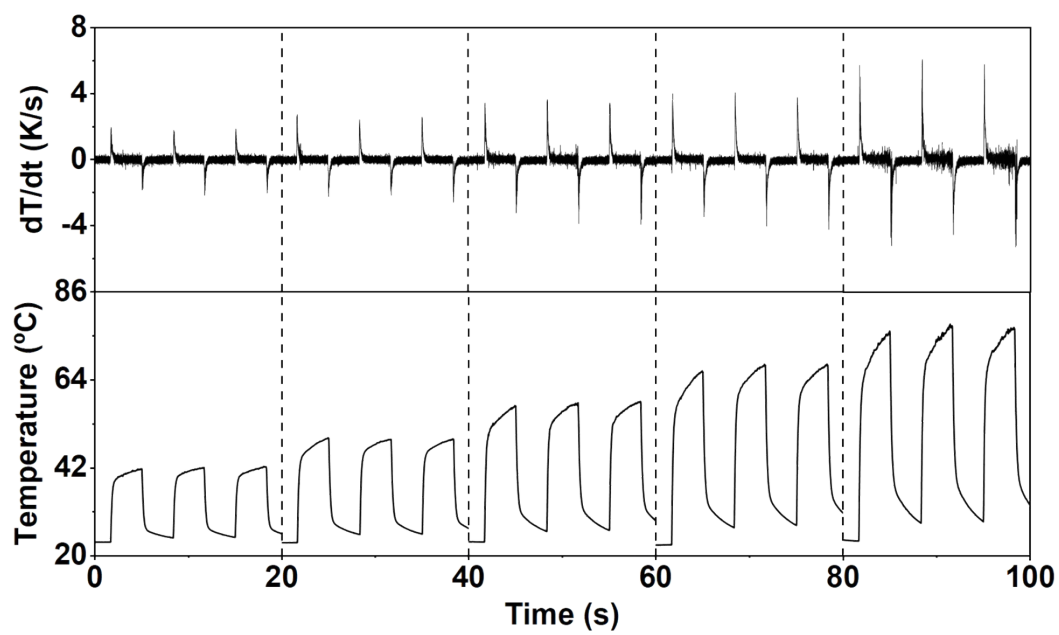

Figure S5 Temperature change and the corresponding change rates.

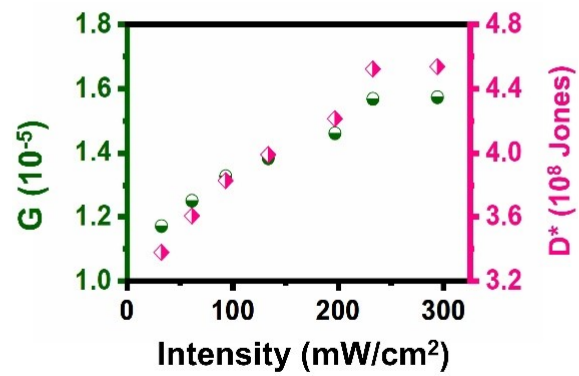

Figure S6 Light intensity-dependent of photoconductive gain  $G$  and specific detectivity  $D^*$ .

**Table S1 Binding energy of different temperature-sintered BTO samples.**

|                | <b>O<sub>L</sub></b> | <b>O<sub>V</sub></b> | <b>O<sub>ads</sub></b> | <b>Ti<sup>3+</sup> 2p3/<br/>2</b> | <b>Ti<sup>3+</sup> 2p1/<br/>2</b> | <b>Ti<sup>4+</sup> 2p3/<br/>2</b> | <b>Ti<sup>4+</sup> 2p1/<br/>2</b> |
|----------------|----------------------|----------------------|------------------------|-----------------------------------|-----------------------------------|-----------------------------------|-----------------------------------|
| <b>1200 °C</b> | 529.0                | 530.8                | 531.8                  | 457.6                             | 463.0                             | 457.9                             | 463.7                             |
| <b>1250 °C</b> | 529.1                | 530.9                | 532.0                  | 457.7                             | 463.1                             | 458.0                             | 463.8                             |
| <b>1300 °C</b> | 529.2                | 530.9                | 532.2                  | 457.8                             | 463.3                             | 458.2                             | 464.0                             |
| <b>1350 °C</b> | 529.2                | 531.0                | 532.4                  | 457.8                             | 463.5                             | 458.2                             | 464.0                             |



**Table S2 Comparison of the Photodetection Parameters for Ti<sup>3+</sup>-BTO Photodetector and Other Ferroelectric Materials Based Self-powered Photodetectors.**

| Photodetector                                                     | Working Mechanism                    | Wavelength<br>h<br>(nm) | R<br>(A/W)            | D*<br>(Jones)        |
|-------------------------------------------------------------------|--------------------------------------|-------------------------|-----------------------|----------------------|
| <sup>1</sup> BaTiO <sub>3</sub>                                   | Photovoltaic-pyroelectric            | 405                     | 3.25×10 <sup>-7</sup> | 2.97×10 <sup>5</sup> |
| <sup>2</sup> BaTiO <sub>3</sub>                                   | Photovoltaic                         | 405                     | 3.5×10 <sup>-7</sup>  | 1.1×10 <sup>6</sup>  |
| <sup>3</sup> BiFeO <sub>3</sub>                                   | Photovoltaic-pyroelectric            | 450                     | 2.4×10 <sup>-7</sup>  | 8.5×10 <sup>8</sup>  |
| <sup>4</sup> Bi <sub>0.5</sub> Na <sub>0.5</sub> TiO <sub>3</sub> | Ferro-pyro-phototronic               | 405                     | 4.06×10 <sup>-6</sup> | 1.27×10 <sup>7</sup> |
| <sup>5</sup> PLZTN9                                               | Ferroelectric photovoltaic           | AM 1.5G                 | 3.67×10 <sup>-7</sup> | 9.08×10 <sup>7</sup> |
| <sup>6</sup> BZT-BCT                                              | Photovoltaic-pyroelectric            | 405                     | 8.48×10 <sup>-7</sup> | 2.37×10 <sup>6</sup> |
| <sup>7</sup> PLZT                                                 | FE polarization and Schottky barrier | 340                     | 1.12×10 <sup>-5</sup> | 4.43×10 <sup>8</sup> |
| Ti <sup>3+</sup> Self-doped BaTiO <sub>3</sub><br>(This work)     | FE polarization and Schottky barrier | 405                     | 5.14×10 <sup>-6</sup> | 4.54×10 <sup>8</sup> |

#### References for Supporting Information

- [1] N. Ma and K. Zhang, Y. Yang, *Adv. Mater.* 2017, **29**, 1703694.
- [2] N. Ma and Y. Yang, *Nano Energy*, 2018, **50**, 417-424.
- [3] J. Qi, N. Ma and Y. Yang, *Adv. Mater. Interfaces*, 2018, **5**, 1701189.
- [4] Y. Liu, Y. Ji, Y. Xia, L. Wu, C. R. Bowen and Y. Yang, *Nano Energy*, 2022, **98**, 107312.
- [5] G. Huangfu, H. Xiao, L. Guan, H. Zhong, C. Hu, Z. Shi and Y. Guo, *ACS Appl. Mater. Interfaces*, 2020, **12**, 33950-33959.
- [6] L. Wang, C. Chen, X. He, K. Yao and Z. Yi, *J. Am. Ceram. Soc.*, 2023, **106**, 389-398
- [7] J. Chen, A. S. Priya, D. You, W. Pei, Q. Zhang, Y. Lu, M. Li, J. Guo and Y. He, *Sens. Actuators A Phys.*, 2020, **315**, 112267
